# Supplementary material for: Complexity of nutrient enrichment on subarctic peatland soil CO 2 and CH 4 production under increasing wildfire and permafrost thaw
Source: Copernicus journal article supplement (doi:10.5194/egusphere-2024-1047), 2024-04-16
Supplement: Supplementary file [file egusphere-2024-1047-AC3-supplement.pdf]

**CC2: 'Comment on egosphere-2024-1047', Nasrollah Sepehrnia, 27 Jul 2024**

Please note that the community comment posted here (CC2) is identical to the CC1 above. Please refer to Reply to CC1 for our replies to the specific comments from this reviewer.
